# Supplementary material for: Non-terminal conjugation of small interfering RNAs with spermine improves duplex binding and serum stability with position-specific incorporation
Source: Royal Society of Chemistry journal article supplement (doi:10.1039/d3ra04918c), 2023-01-01

## *Supporting Information*

### **Non-terminal conjugation of small interfering RNAs with spermine improves duplex binding and serum stability with position-specific incorporation**

**Keisuke Koyasu<sup>a</sup>, Akash Chandela<sup>b</sup> and Yoshihito Ueno<sup>\*a, b, c</sup>**

<sup>a</sup>Department of Life Science and Chemistry, Graduate School of Natural Science and Technology, Gifu University, <sup>b</sup>Course of Applied Life Science, Faculty of Applied Biological Sciences, Gifu University, <sup>c</sup>United Graduate School of Agricultural Science, Gifu University, 1-1 Yanagido, Gifu, 501-1193, Japan.

\*To whom correspondence should be addressed.

Phone: +81-58-293-2919; Fax: +81-58-293-2919.

E-mail: ueno.yoshihito.e7@f.gifu-u.ac.jp

#### **Table of Contents**

|                                                                                                                            |        |
|----------------------------------------------------------------------------------------------------------------------------|--------|
| <b>Fig. S1.</b> UV melting profiles of the RNA duplexes .....                                                              | S2     |
| <b>Fig. S2-3.</b> UV melting profiles of the siRNAs .....                                                                  | S2-3   |
| <b>Table S1.</b> Sequence of siRNAs for serum stability .....                                                              | S3     |
| <b><sup>1</sup>H and <sup>13</sup>C NMR spectra of compounds 3-14 and <sup>31</sup>P NMR spectrum of compound 15</b> ..... | S4-S16 |

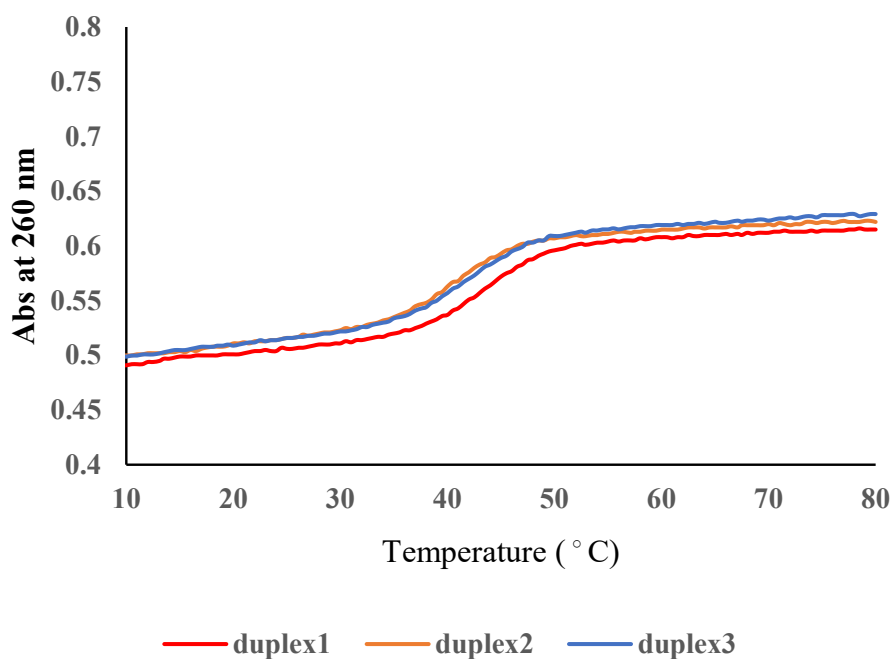

**Fig. S1.** UV melting profiles of the unmodified and modified RNA duplexes in a buffer containing 10 mM sodium phosphate (pH 7.0) and 100 mM NaCl.

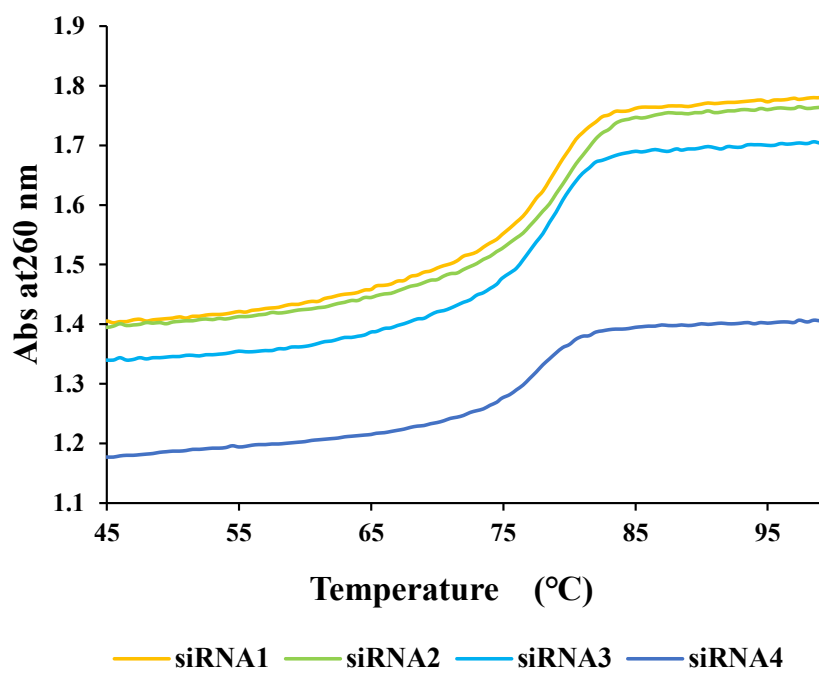

**Fig. S2.** UV melting profiles of the unmodified and modified siRNAs (siRNA 1-4) in a buffer containing 10 mM sodium phosphate (pH 7.0) and 100 mM NaCl.

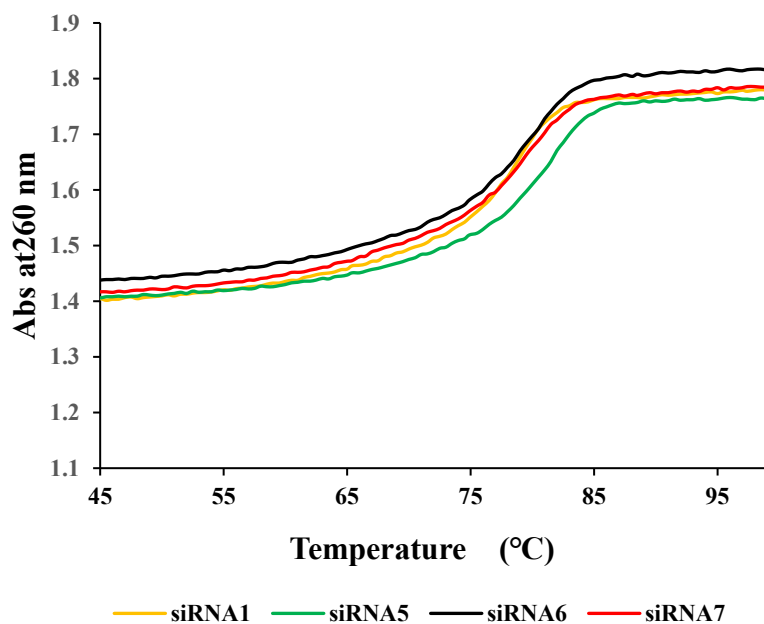

**Fig. S3.** UV melting profiles of the unmodified and modified siRNAs (siRNA1, 7-9) in a buffer containing 10 mM sodium phosphate (pH 7.0) and 100 mM NaCl.

**Table S1.** Sequence of siRNAs for Serum stability analysis

| Abbreviation of siRNA | Abbreviation of RNA | Sequence <sup>a</sup>                                   |
|-----------------------|---------------------|---------------------------------------------------------|
|                       |                     | Sense strand                                            |
| siRNA 8               | RNA 5               | 5'-GGCCUUUCACUACUCCUACUU-3'                             |
|                       | RNA 13              | 3'-UUCCGGAAAGUGAUGAGGAUG-F-5'                           |
|                       |                     | Antisense strand                                        |
| siRNA 9               | RNA 6               | 5'-GGCCU <sub>s</sub> UUCACUACUCCUACUU-3'               |
|                       | RNA 13              | 3'-UUCCGGAAAGUGAUGAGGAUG-F-5'                           |
| siRNA 10              | RNA 7               | 5'-GGCCUUUCACU <sub>s</sub> ACUCCUACUU-3'               |
|                       | RNA 13              | 3'-UUCCGGAAAGUGAUGAGGAUG-F-5'                           |
| siRNA 11              | RNA 8               | 5'-GGCCUUUCACUACUCCU <sub>s</sub> ACUU-3'               |
|                       | RNA 13              | 3'-UUCCGGAAAGUGAUGAGGAUG-F-5'                           |
| siRNA 12              | RNA 10              | 5'-GGCCU <sub>ss</sub> UUCACUACUCCUACUU-3'              |
|                       | RNA 13              | 3'-UUCCGGAAAGUGAUGAGGAUG-F-5'                           |
| siRNA 13              | RNA 11              | 5'-GGCCUUUCACU <sub>ss</sub> ACUCCUACUU-3'              |
|                       | RNA 13              | 3'-UUCCGGAAAGUGAUGAGGAUG-F-5'                           |
| siRNA 14              | RNA 12              | 5'-GGCCU <sub>s</sub> UUCACU <sub>s</sub> ACUCCUACUU-3' |
|                       | RNA 13              | 3'-UUCCGGAAAGUGAUGAGGAUG-F-5'                           |

<sup>(a)</sup> F is fluorescein, U is 2'-OMe-4'-HP-U analog and s is spermine molecule.

NMR spectra (<sup>1</sup>H, <sup>13</sup>C and <sup>31</sup>P)

<sup>1</sup>H NMR spectrum of compound **3**

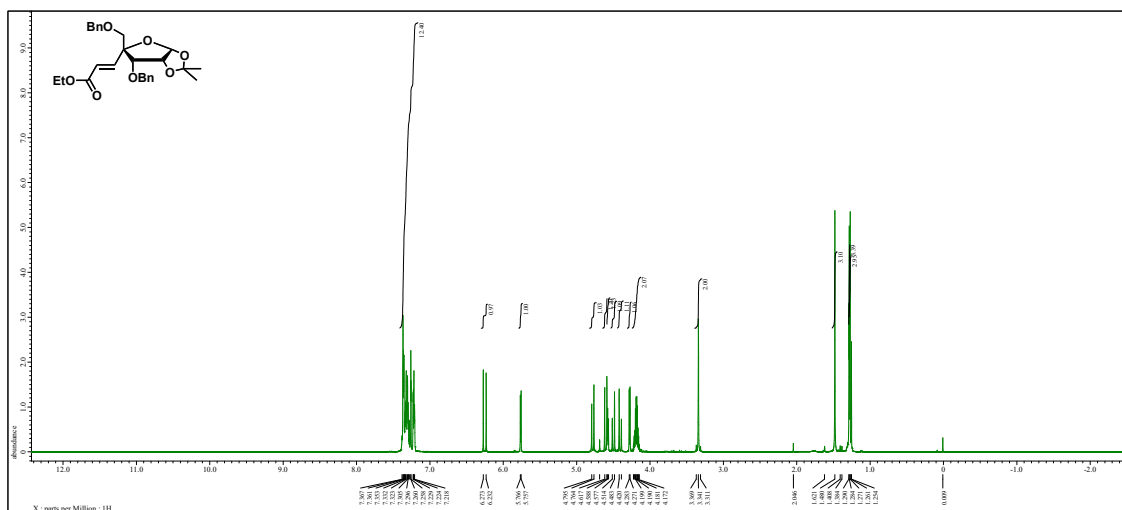

<sup>13</sup>C {<sup>1</sup>H } NMR spectrum of compound **3**

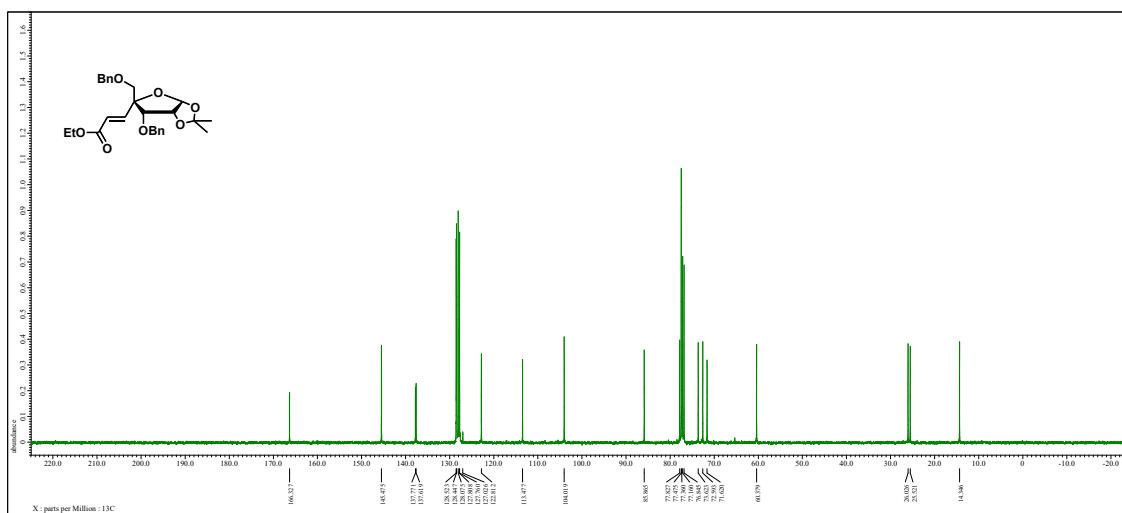

<sup>1</sup>H NMR spectrum of compound 4

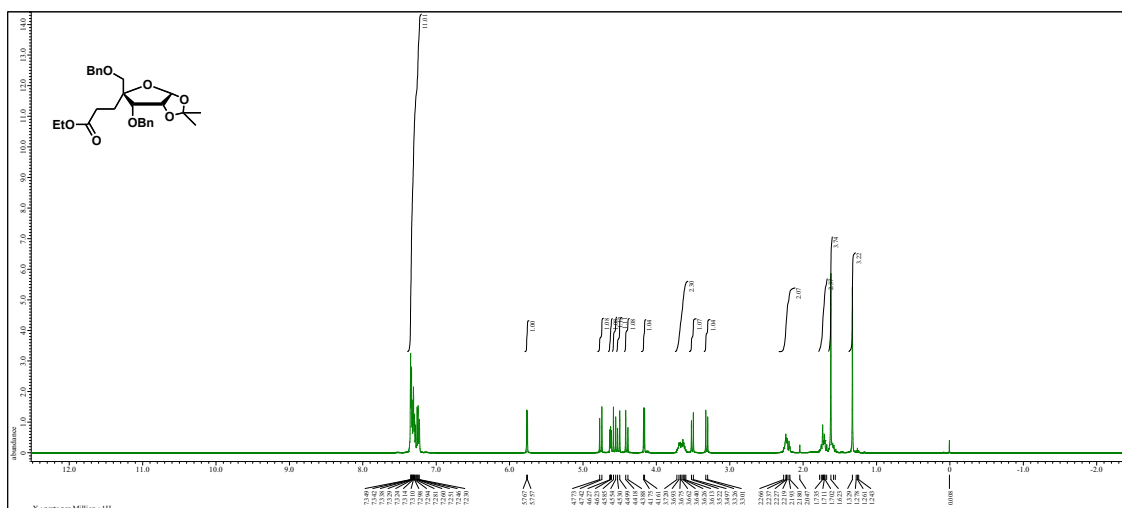

<sup>13</sup>C {<sup>1</sup>H} NMR spectrum of compound 4

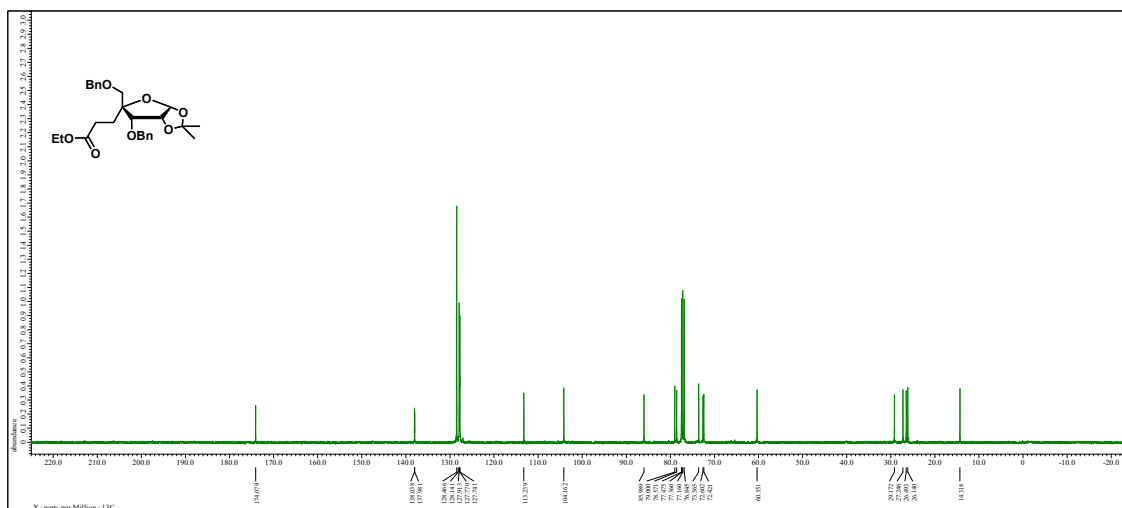

<sup>1</sup>H NMR spectrum of compound **5**

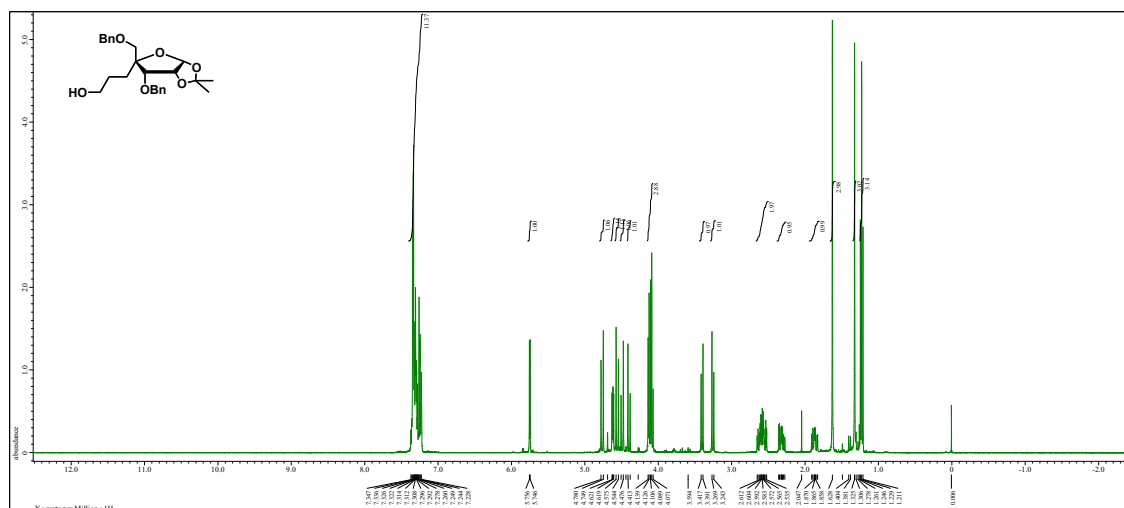

<sup>13</sup>C {<sup>1</sup>H} NMR spectrum of compound **5**

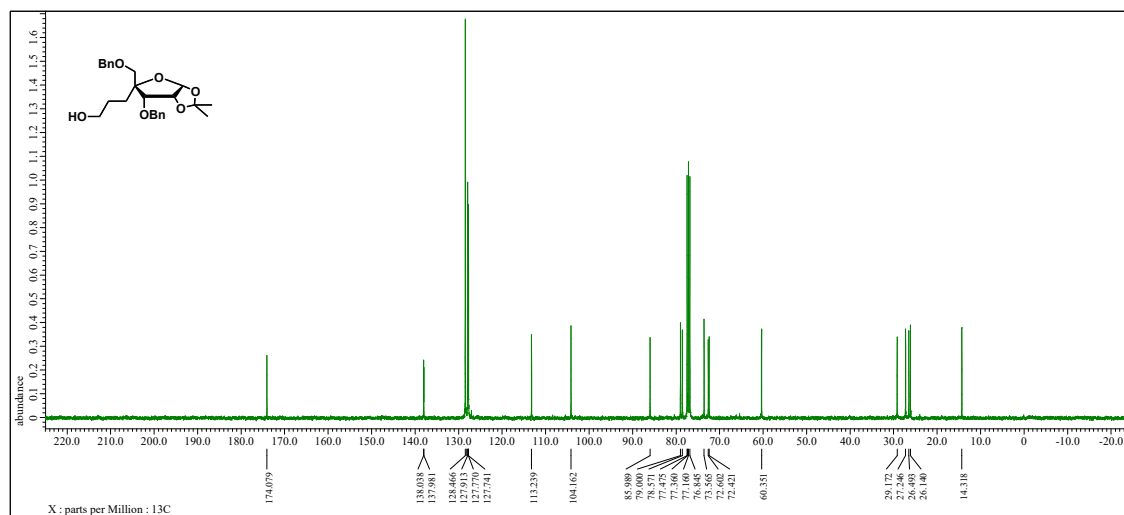







$^1\text{H}$  NMR spectrum of compound **8**

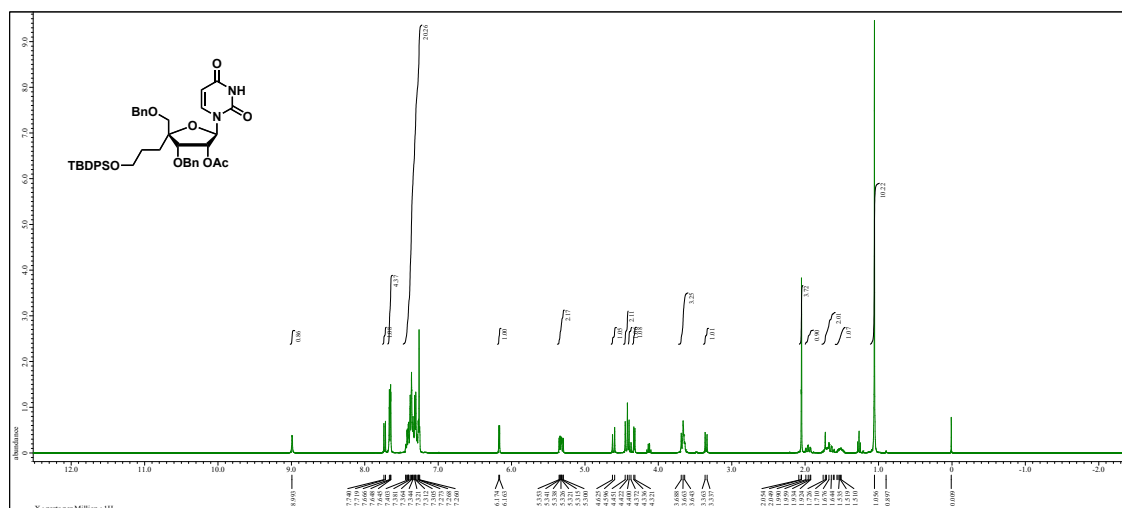

$^{13}\text{C}$   $\{^1\text{H}\}$  NMR spectrum of compound **8**

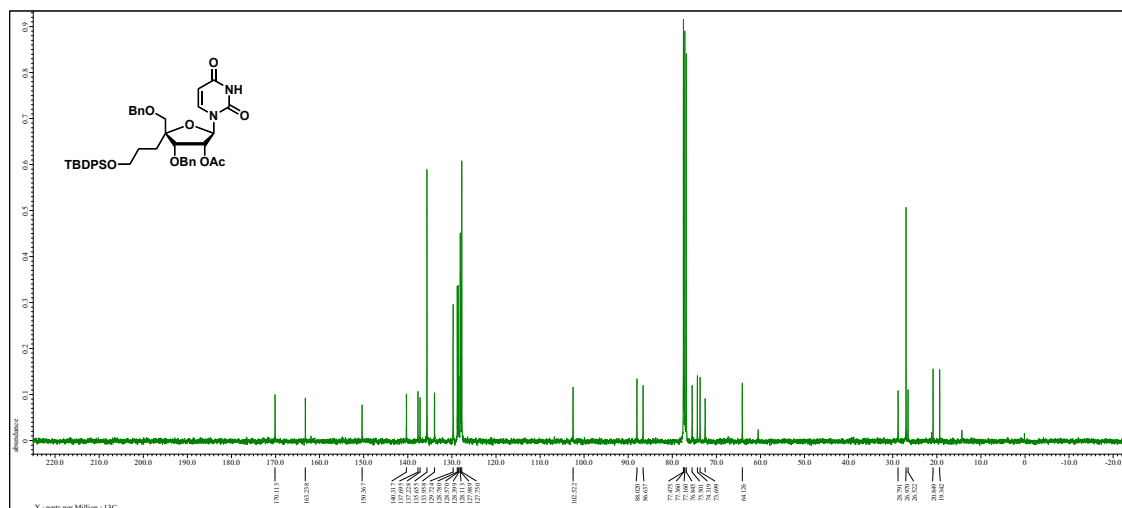



$^1\text{H}$  NMR spectrum of compound **10**

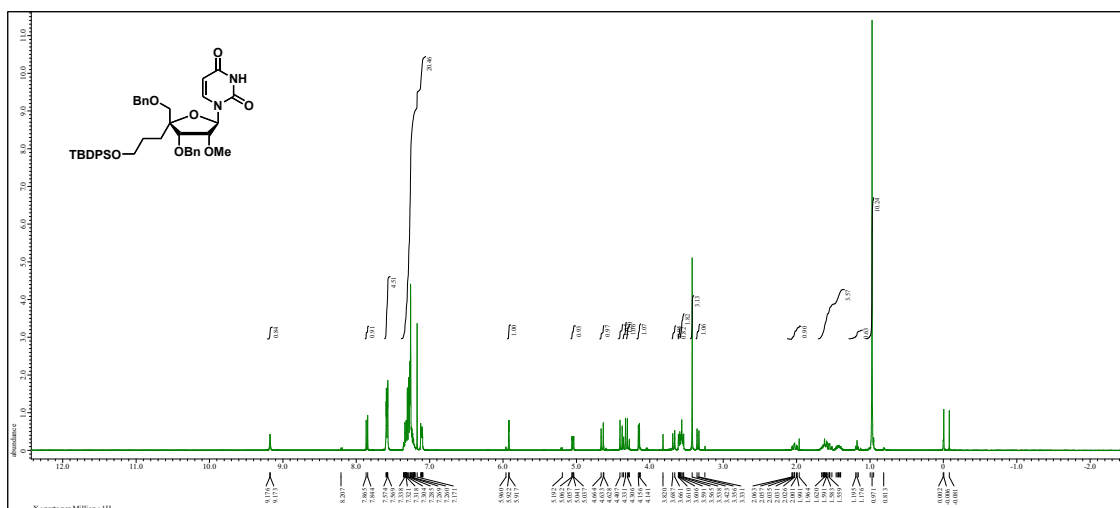

$^{13}\text{C}$  { $^1\text{H}$ } NMR spectrum of compound **10**

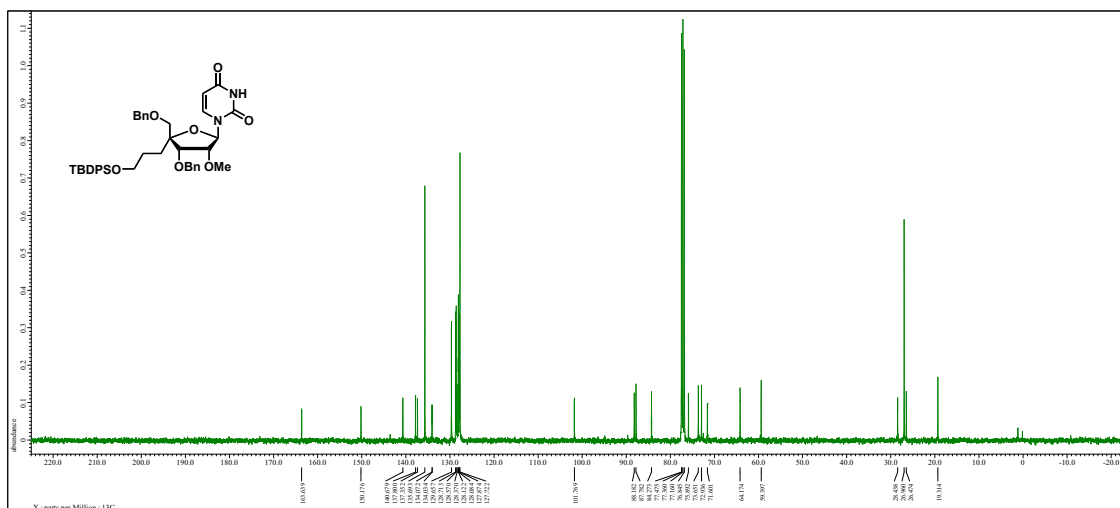

$^1\text{H}$  NMR spectrum of compound **11**

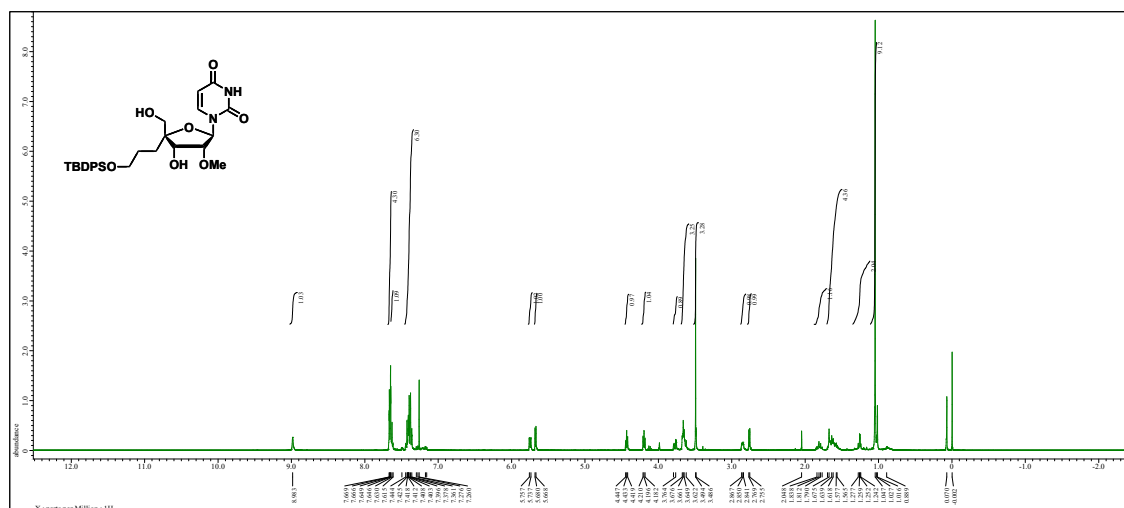

$^{13}\text{C}$  { $^1\text{H}$ } NMR spectrum of compound **11**

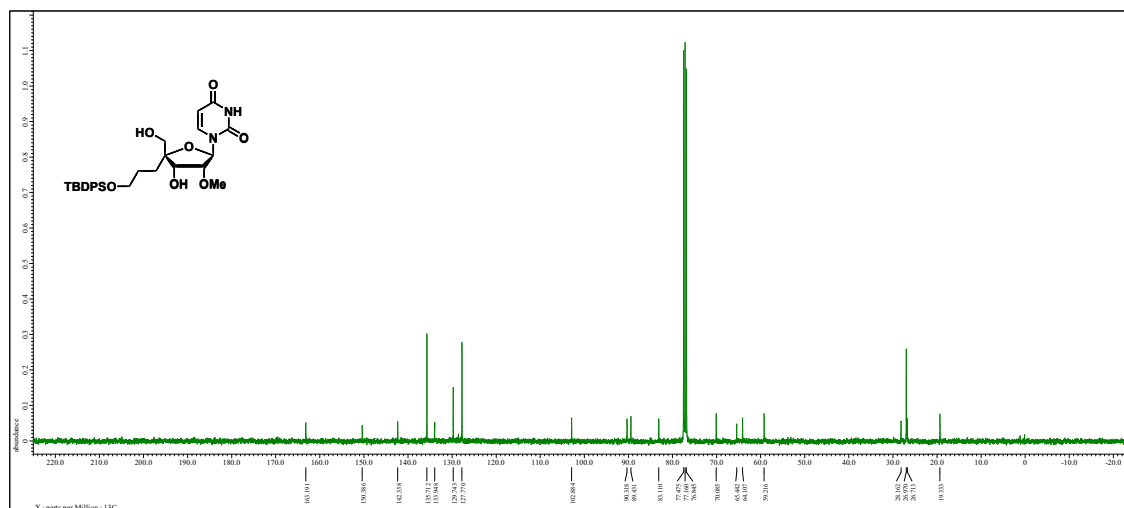



<sup>1</sup>H NMR spectrum of compound **13**

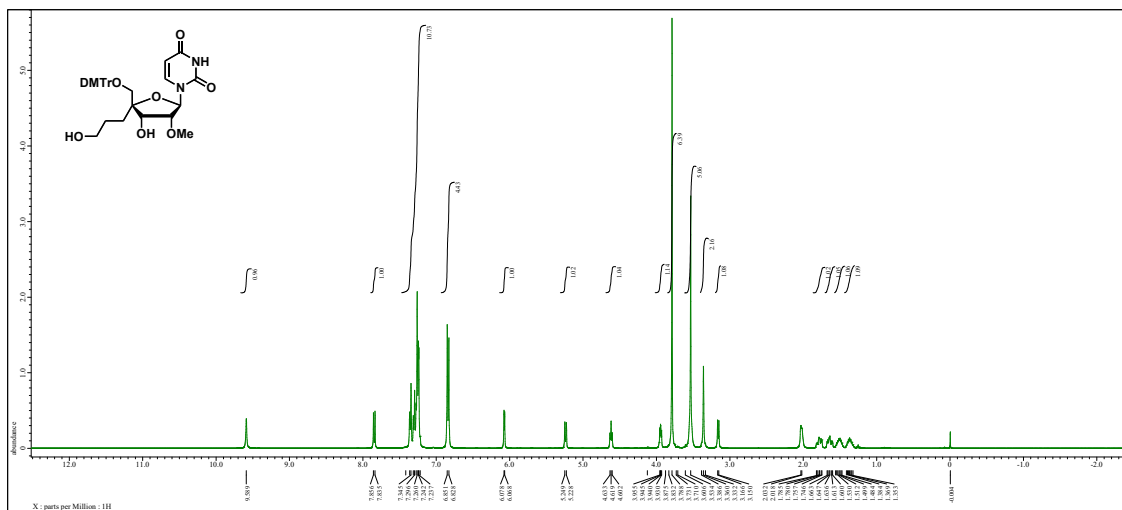

<sup>13</sup>C {<sup>1</sup>H} NMR spectrum of compound **13**

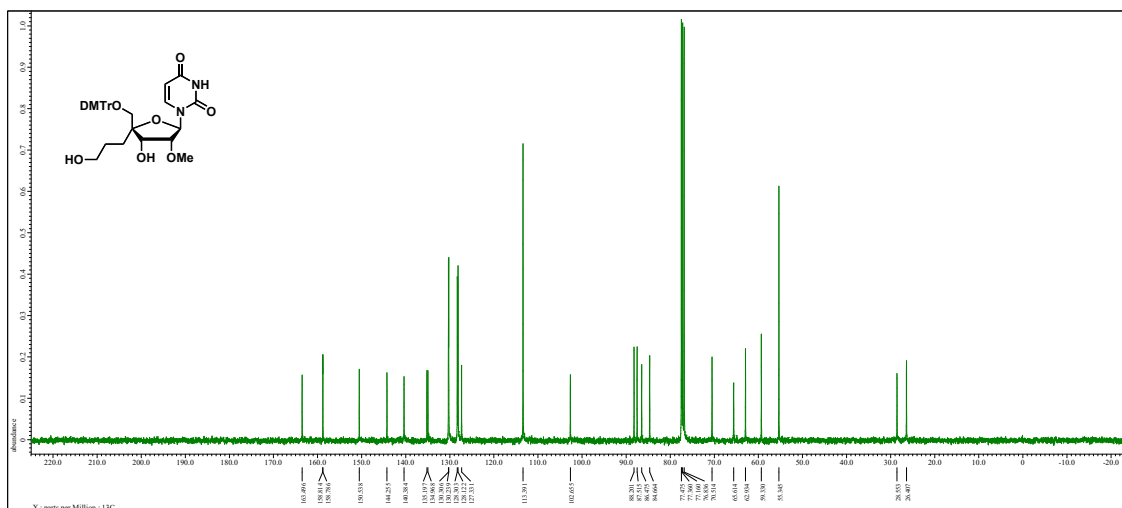



<sup>31</sup>P NMR spectrum of compound **15**

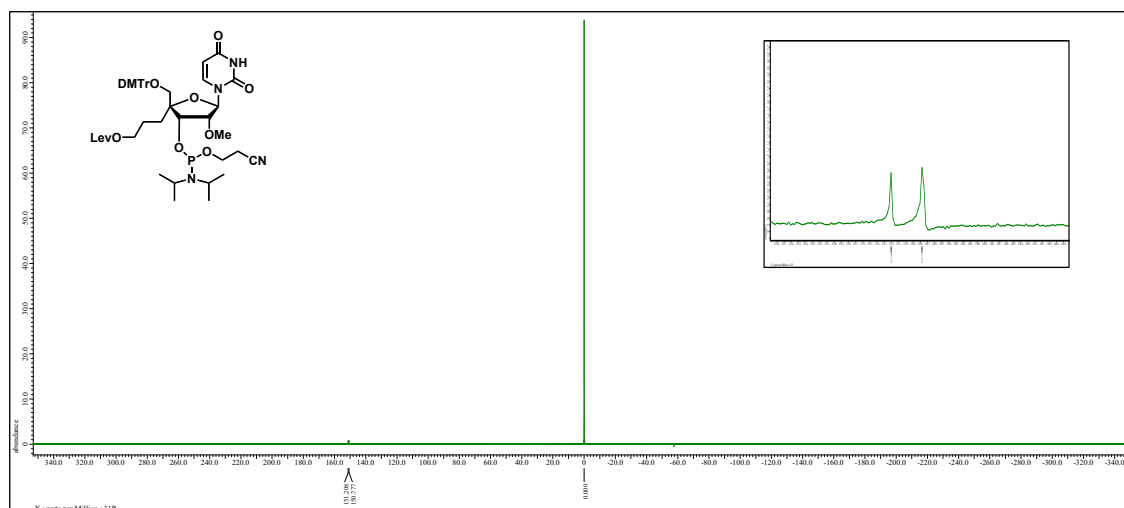

Supplement: d3ra04918c1.pdf [file d3ra04918c1.pdf]
